# Supplementary figures and images for: Linking morphology with activity through the lifetime of pretreated PtNi nanostructured thin film catalysts
Source: Royal Society of Chemistry journal article supplement (doi:10.1039/c5ta01854d), 2015-01-01

# Visualization of NSTF Surfaces and Pore Structure

**Dealloy+Anneal**

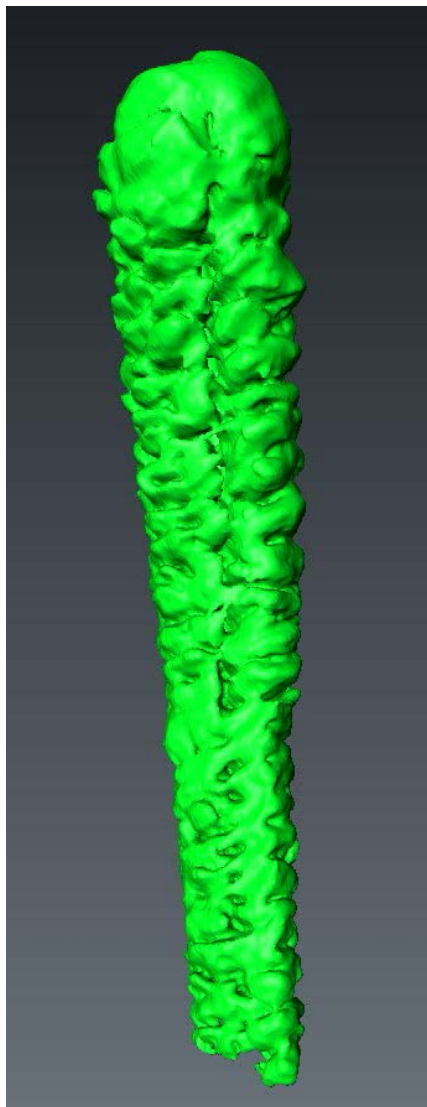

**Conditioned**

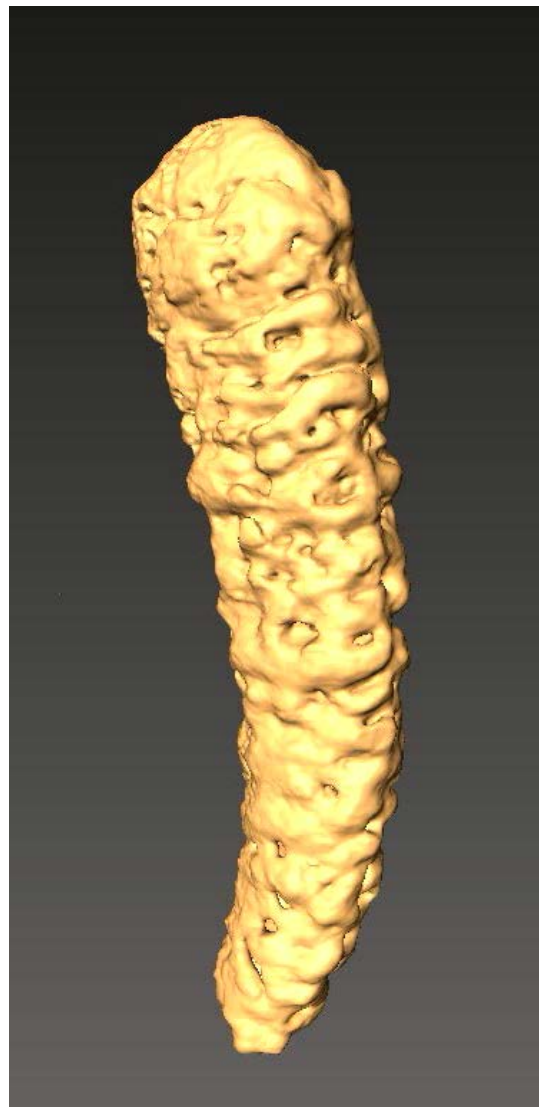

**Cycled**

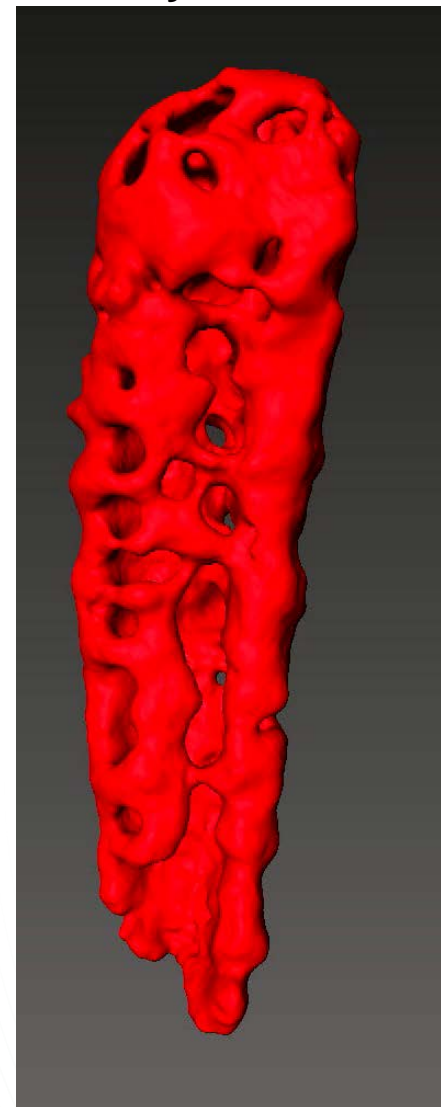

Supplement: c5ta01854d1.pdf [file c5ta01854d1.pdf]
